# Supplementary material
Source: PubMed Central journal article supplement (PMC3389981)
Supplement: supp_112.138578_TableS4.pdf [file supp_112.138578_TableS4.pdf]

**Table S4** Location of the 33 *parviglumis* study populations with mean per-SNP values of summary statistics

| Population    | State/    | Latitude | Longitude | Altit- | N  | F    | HWE_    |            |       | Fay/ |       |
|---------------|-----------|----------|-----------|--------|----|------|---------|------------|-------|------|-------|
|               | Province  |          |           | ude    |    |      | P-value | $\theta_H$ | $\pi$ | TajD | Wu H  |
| Crustel       | Guererro  | 18.383   | -100.145  | 985    | 22 | 0.84 | 0.48    | 0.32       | 0.26  | 1.31 | -0.06 |
| Amates 1      | Guererro  | 18.388   | -100.128  | 1110   | 25 | 0.74 | 0.47    | 0.31       | 0.28  | 1.36 | -0.03 |
| Amates 2      | Guererro  | 18.394   | -100.108  | 1210   | 24 | 0.75 | 0.39    | 0.30       | 0.28  | 1.31 | -0.02 |
| Iguala        | Guererro  | 18.414   | -99.909   | 1506   | 28 | 0.36 | 0.96    | 0.31       | 0.28  | 1.51 | -0.03 |
| Rincon        | Guererro  | 18.350   | -99.841   | 1624   | 28 | 0.30 | 0.20    | 0.31       | 0.27  | 1.68 | -0.04 |
| Ahuacatitlan  | Guererro  | 18.356   | -99.814   | 1528   | 19 | 0.18 | 0.59    | 0.29       | 0.27  | 1.43 | -0.02 |
| Huetamo 1     | Michoacan | 19.063   | -101.283  | 832    | 25 | 0.58 | 0.63    | 0.31       | 0.25  | 1.28 | -0.06 |
| Puerto 1      | Michoacan | 18.963   | -101.058  | 870    | 20 | 0.53 | 0.66    | 0.32       | 0.26  | 1.26 | -0.06 |
| Zapote        | Michoacan | 18.938   | -101.048  | 915    | 24 | 0.38 | 0.59    | 0.31       | 0.26  | 1.33 | -0.05 |
| Puerto 2      | Michoacan | 18.916   | -101.000  | 727    | 20 | 0.56 | 0.58    | 0.31       | 0.24  | 1.12 | -0.07 |
| Huetamo 2     | Michoacan | 18.900   | -100.979  | 677    | 20 | 0.60 | 0.46    | 0.30       | 0.25  | 1.09 | -0.05 |
| Cuirindalillo | Michoacan | 18.883   | -100.957  | 697    | 21 | 0.40 | 0.69    | 0.31       | 0.25  | 1.03 | -0.06 |
| Crucero       | Michoacan | 18.794   | -100.946  | 653    | 25 | 0.90 | 0.02    | 0.30       | 0.23  | 1.17 | -0.07 |
| Quenchendio   | Michoacan | 18.805   | -100.946  | 635    | 26 | 0.88 | 0.51    | 0.31       | 0.25  | 1.09 | -0.06 |
| Potrero       | Michoacan | 18.820   | -100.916  | 654    | 20 | 0.60 | 0.85    | 0.30       | 0.26  | 1.12 | -0.04 |
| Crucita       | Michoacan | 18.858   | -100.857  | 609    | 29 | 0.78 | 0.56    | 0.31       | 0.25  | 1.25 | -0.06 |
| Guayabo       | Michoacan | 18.862   | -100.844  | 555    | 27 | 0.61 | 0.12    | 0.31       | 0.25  | 1.23 | -0.06 |
| Toluca 1      | Mexico    | 18.899   | -100.181  | 1422   | 24 | 0.31 | 0.74    | 0.31       | 0.27  | 1.33 | -0.04 |
| Toluca 2      | Mexico    | 18.895   | -100.209  | 1355   | 23 | 0.50 | 0.86    | 0.31       | 0.28  | 1.22 | -0.03 |
| Toluca 3      | Mexico    | 18.854   | -100.239  | 1015   | 19 | 0.66 | 0.82    | 0.32       | 0.27  | 1.06 | -0.05 |
| Salitre-Monte | Mexico    | 18.842   | -100.238  | 958    | 23 | 0.28 | 0.23    | 0.31       | 0.27  | 1.17 | -0.04 |
| Taretan       | Michoacan | 19.344   | -101.944  | 1170   | 18 | 0.58 | 0.90    | 0.29       | 0.21  | 0.98 | -0.08 |
| Los Guajes    | Michoacan | 19.231   | -100.491  | 985    | 27 | 0.76 | 0.65    | 0.31       | 0.27  | 1.36 | -0.04 |
| Norte         | Michoacan | 19.281   | -100.434  | 1332   | 27 | 0.50 | 0.85    | 0.30       | 0.27  | 1.33 | -0.03 |
| Zuluapan 1    | Mexico    | 19.148   | -100.355  | 1178   | 28 | 0.53 | 0.46    | 0.31       | 0.28  | 1.33 | -0.03 |
| Zuluapan 2    | Mexico    | 19.146   | -100.329  | 1346   | 30 | 0.52 | 0.73    | 0.31       | 0.27  | 1.30 | -0.04 |
| Zacazonapan 1 | Mexico    | 19.079   | -100.266  | 1468   | 28 | 0.27 | 0.99    | 0.30       | 0.26  | 1.33 | -0.04 |
| Zacazonapan 2 | Mexico    | 19.039   | -100.295  | 1085   | 28 | 0.70 | 0.71    | 0.32       | 0.27  | 1.38 | -0.05 |
| El Puente     | Mexico    | 19.029   | -100.296  | 1075   | 24 | 0.67 | 0.76    | 0.31       | 0.27  | 1.30 | -0.04 |
| Queretanillo  | Michoacan | 19.551   | -100.918  | 1342   | 28 | 0.41 | 0.32    | 0.32       | 0.26  | 1.33 | -0.06 |
| Temascal 1    | Michoacan | 19.483   | -100.921  | 1100   | 28 | 0.36 | 0.80    | 0.32       | 0.27  | 1.33 | -0.05 |
| Temascal 2    | Michoacan | 19.464   | -100.912  | 1030   | 19 | 0.55 | 0.27    | 0.31       | 0.27  | 1.18 | -0.04 |
| Casa Blanca   | Michoacan | 19.161   | -101.329  | 1268   | 26 | 0.33 | 0.00    | 0.33       | 0.26  | 1.40 | -0.07 |

N: sample size; F: frequency of *Inv1n-l*.
