# Supplementary material
Source: PubMed Central journal article supplement (PMC3389981)
Supplement: supp_112.138578_TableS6.pdf [file supp_112.138578_TableS6.pdf]

**Table S6 Mean Bayes factors for all environmental variables and inversion as single marker, all the SNPs in *Inv1n* and all SNPs. T: temperature.**

|                                     | Inversion | SNPs in <i>Inv1n</i> | All SNPs |
|-------------------------------------|-----------|----------------------|----------|
| Longitude                           | 0.36      | 0.69                 | 1020.37  |
| Latitude                            | 1.64      | 0.87                 | 34.59    |
| Altitude                            | 136.37    | 124.63               | 5.86     |
| Annual Mean T                       | 18.93     | 12.57                | 5.75     |
| Mean Diurnal T Range                | 0.82      | 4.35                 | 28.61    |
| Isothermality                       | 1.26      | 0.84                 | 2.77     |
| T Seasonality                       | 0.92      | 0.87                 | 2.15     |
| Max T of Warmest<br>Month           | 22.46     | 16.42                | 5.76     |
| Min T of Coldest<br>Month           | 11.47     | 5.69                 | 7.43     |
| T Annual Range                      | 1.90      | 9.75                 | 28.75    |
| Mean T of Wettest<br>Quarter        | 21.04     | 17.20                | 9.33     |
| Mean T of Driest<br>Quarter         | 48.98     | 26.87                | 3.35     |
| Mean T of Warmest<br>Quarter        | 21.27     | 13.83                | 5.30     |
| Mean T of Coldest<br>Quarter        | 17.19     | 10.34                | 6.66     |
| Annual Precipitation                | 0.88      | 1.26                 | 2.69     |
| Precipitation of<br>Wettest Month   | 0.33      | 0.53                 | 19.25    |
| Precipitation of Driest<br>Month    | 47.29     | 17.46                | 2.40     |
| Precipitation<br>Seasonality        | 10.54     | 3.67                 | 2.24     |
| Precipitation of<br>Wettest Quarter | 0.46      | 0.70                 | 2.89     |
| Precipitation of Driest<br>Quarter  | 34.48     | 17.86                | 4.53     |
| Precipitation of<br>Warmest Quarter | 0.44      | 0.51                 | 1.73     |
| Precipitation of<br>Coldest Quarter | 5.21      | 2.45                 | 1.43     |
